# Supplementary material
Source: HighWire-hosted journal article supplement (https://bjsm.bmj.com/content/bjsports-2019-101456)
Supplement: inline-supplementary-material-1 [file inline-supplementary-material-1.xlsx]

## Sheet: TABLE 1 - Summary
ID	Authors and year	Year	Aim	Patient population	Context	No. of studies included	No. of questionnaires examined (type)	Suggested instruments (for hip) -	Authors conclusions/recommendations
#1	d'Entremont et al.	2015	[…] to answer the following research questions: (1) Which hip-specific PROs are used in pediatric populations with impingement? (2) What clinimetric evidence exists for the use of these specific PROs in this population?	Hip impingement in pediatric population (0-18 years old)	Surgery	n=13 for question 1, n=0 for question 2	n=6 (patient and clinical oriented questionnaires, disease-/side-specific instruments)	None	We […] were unable to find any research validating these PROs in any pediatric population
#2	Lodhia et al.	2011	The purpose of our study was to systematically review the content (aim 1) and clinimetric evidence (aim 2) of published PRO instruments used in FAI and labral hip pathology studies.	Hip impingment and labral tears patients	Surgery	n=22 for aim 1 (PROMs identification),n= 5 for aim 2 (PROMs clinimetric properties)	n=6 (patient and clinical oriented questionnaires, disease-/side-specific instruments)	WOMAC (12 items), HOS, NAHS	This review shows that further clinimetric evaluation of commonly used PRO instruments for nonarthritic hip pathology is warranted.
#3	Thorborg et al.	2010	[…] to provide recommendations for choice of PRO questionnaire when assessing patients with hip and/or groin disability in studies or clinical databases concerning outcomes of various types of surgical, medical or exercise treatments.	Hip or/and groin disability patients	Any treatment	n=41	n=13 (n=12 for hip disability and n=1 for groin pain)	HOOS and HOS	Based on the results of our present study, we recommend HOOS for evaluating patients with hip OA undergoing nonsurgical treatment and surgical interventions such as THR. HOS is recommended for evaluating patients undergoing hip arthroscopy. C
#4	Thorborg et al.	2015	[…] we systematically evaluated the clinimetric evidence pertaining to PROs for young-aged and middle-aged patients with hip or groin problems.	Hip or/and groin disability patients between 18 and 50 years old	Any treatment	n=20	n=10 (n=9 for hip disability and n=1 for groin pain)	HAGOS, HOS, IHOT-12 and IHOT-33	The methodological quality of the existing reports varies greatly and can be considerably improved.
#5	Tijssen et al.	2011	The aim of this systematic review was to investigate which PRO questionnaires are valid and reliable in the evaluation of patients undergoing hip arthroscopy.	Hip arthroscopy patients	Surgery	n=5	n=3 (disease-/side-specific and generic instruments)	NAHS and HOS	This systematic review shows that there is no conclusive evidence for the use of a single patient-reported outcome questionnaire in the evaluation of patients undergoing hip arthroscopy.
#6	Veenof et al.	2006	The objective of this article was to give an overview of published self-assessment (self-administered and interview-based) instruments on pain, physical function, and patient global assessment for patients with hip and/or knee OA.	Patients with hip and knee osteoarthritis	Generic, pre surgery	n=37	n=24 disease-/side-specific and generic instruments); n=6 generic instruments; n=1 patient-specific instrument	WOMAC and SF36	[...] these questionnaires are recommended for evaluating pain and physical function in patients with hip and/or knee OA. Completed with a measure on patient global assessment, these instruments could be recommended in guidelines concerning outcome measurement in OA trials.

## Sheet: AMSTAR2
ID	Authors and year	Year	Overall Rating	1. Did the research questions and inclusion criteria for the review include the components of PICO?	2. Did the report of the review contain an explicit statement that the review methods were established prior to the conduct of the review and did the report justify any significant deviations from the protocol?	3. Did the review authors explain their selection of the study designs for inclusion in the review?	4. Did the review authors use a comprehensive literature search strategy?	5. Did the review authors perform study selection in duplicate?	6. Did the review authors perform data extraction in duplicate?	7. Did the review authors provide a list of excluded studies and justify the exclusions?	8. Did the review authors describe the included studies in adequate detail?	9. Did the review authors use a satisfactory technique for assessing the risk of bias (RoB) in individual studies that were included in the review? Note: use of COSMIN or similar	10. Did the review authors report on the sources of funding for the studies included in the review?	11. NA	12. NA	13. Did the review authors account for RoB in individual studies when interpreting/ discussing the results of the review?	14.NA	15. NA	16. Did the review authors report any potential sources of conflict of interest, including any funding they received for conducting the review?
#1	Veenof et al.	2006	Critically low	YES	NO	YES	NO	YES	YES	NO	YES	NO	NO			NO			YES
#2	Thorborg et al.	2010	Critically low	YES	NO	YES	YES	YES	YES	NO	YES	NO	NO			NO			YES
#3	Lodhia et al.	2011	Critically low	YES	NO	YES	NO	YES	YES	YES	NO	NO	NO			NO			YES
#4	Tijssen et al.	2011	Moderate	YES	NO	YES	YES	YES	YES	NO	YES	YES	NO			YES			YES
#5	Thorborg et al.	2015	Moderate	YES	YES	YES	YES	YES	YES	NO	YES	YES	NO			YES			YES
#6	d'Entremont et al.	2015	Critically low	YES	NO	NO	Partial YES	YES	YES	NO	YES	NO	NO			NO			YES
